# Supplementary material for: The Effect of Arabinoxylan and Wheat Bran Incorporation on Dough Rheology and Thermal Processing of Rotary-Moulded Biscuits
Source: MDPI journal article supplement (doi:10.3390/foods10102335), 2021-09-30
Supplement: s1 [file s1]

## Supplementary Material

**Table S1:** The chemical composition (% of total weight) of refined flour (RF), whole flour with large bran fraction (WFL), and whole flour with small bran fraction (WFS).

| Flour components<br>(% of total weight) | RF   | WFL  | WFS  |
|-----------------------------------------|------|------|------|
| Starch                                  | 70.6 | 58.5 | 59.2 |
| Moisture                                | 13.9 | 13.2 | 12.1 |
| Proteins                                | 10.0 | 11.4 | 11.5 |
| Total fiber                             | 3.6  | 13.0 | 13.2 |
| Lipids                                  | 1.3  | 2.0  | 2.1  |
| Ash                                     | 0.6  | 1.9  | 1.9  |
